# Supplementary material for: Phenotypic evolution from genetic polymorphisms in a radial network architecture
Source: PubMed Central journal article supplement (PMC2194667; doi:10.1186/1741-7007-5-50), 2007-11-14

SUPPLEMENTARY FIGURE 3

Effect of the missing genotypes estimation on the overall dynamics. The table summarizes the four missing genotypes and their estimates following three different methods: taking the average of the population (624g), estimating from the mean of the neighbor genotypes, and estimating from the regressions of Figure 2. The figure below presents the resulting dynamics, with the same parameters as Figure 3B. The differences are in the same order of magnitude as the stochastic differences between the repetitions, and the method to estimate the missing genotypes appears to have almost no influence on the results.

| <i>Growth4</i> | <i>Growth6</i> | <i>Growth9</i> | <i>Growth12</i> | Average | Neighbors | Regression |
|----------------|----------------|----------------|-----------------|---------|-----------|------------|
| HH             | LL             | HH             | LL              | 624     | 605       | 630        |
| LL             | HH             | HH             | HH              | 624     | 620       | 730        |
| LL             | HH             | LL             | HH              | 624     | 609       | 560        |
| LL             | LL             | LL             | HH              | 624     | 606       | 590        |

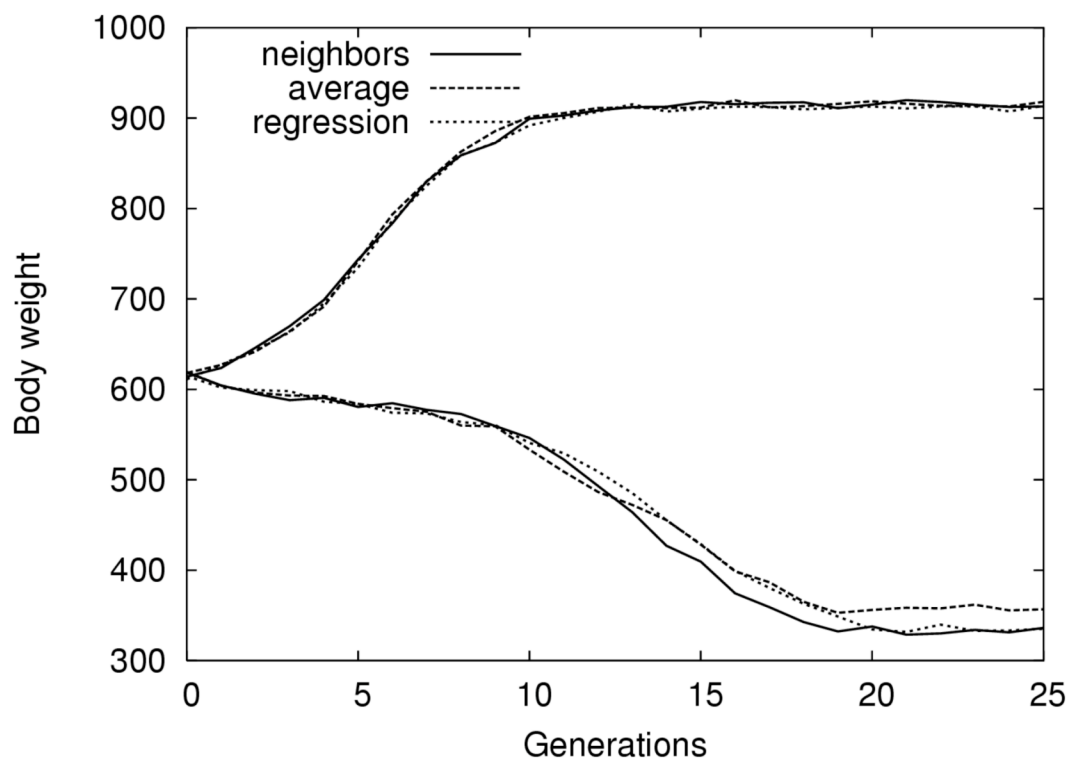

Supplement: 1741-7007-5-50-S3.pdf [file 1741-7007-5-50-S3.pdf]
